# Supplementary material for: Alterations in microbial community composition with increasing f CO 2 : a mesocosm study in the eastern Baltic Sea
Source: Copernicus journal article supplement (doi:10.5194/bg-14-3831-2017), 2017-08-29
Supplement: Supplementary file 1 [file bg-14-3831-2017-supplement.pdf]

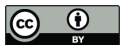

## *Supplement of*

# **Alterations in microbial community composition with increasing $f\text{CO}_2$ : a mesocosm study in the eastern Baltic Sea**

**K. J. Crawford et al.**

*Correspondence to:* Katharine J. Crawford ([kate.crawford@gmail.com](mailto:kate.crawford@gmail.com))  
and Corina P. D. Brussaard ([corina.brussaard@nioz.nl](mailto:corina.brussaard@nioz.nl))

The copyright of individual parts of the supplement might differ from the CC BY 3.0 License.

**Table S1.** Viral lysis rates ( $d^{-1}$ ) of the phytoplankton groups detected by flow cytometry in M1 (low  $fCO_2$ ) and M3 (high  $fCO_2$ ), as determined by dilution assays performed on the days specified. Lysis rates are calculated as total loss rates (from 30 KDa dilutions) minus grazing rates (from 0.45  $\mu m$  dilutions). Significant lysis specified as  $p \leq 0.05$  is marked with an asterisk. A zero means no lysis was detected, no data denotes a failed experiment.

| Rate $d^{-1}$ |       |        |         |          |         |         |            |         |         |          |         |         |
|---------------|-------|--------|---------|----------|---------|---------|------------|---------|---------|----------|---------|---------|
| Mesocosm 1    |       |        |         |          |         |         | Mesocosm 3 |         |         |          |         |         |
| Day           | Syn   | Pico I | Pico II | Pico III | Nano I  | Nano II | Syn        | Pico I  | Pico II | Pico III | Nano I  | Nano II |
| 1             |       |        |         | -0.09    |         |         | 0          | -0.09   | -0.03   | 0        |         | -0.1    |
| 3             | 0     | -0.09  |         |          |         | -0.61   |            | -0.11 * |         |          | -0.21   |         |
| 6             |       | 0      | -0.35   |          |         |         |            |         | -0.43 * |          | -0.76 * |         |
| 10            | 0     | -0.02  | 0       | 0        | 0       | -0.01   |            | -0.21 * | -0.12   |          | -0.13   | -0.02   |
| 13            | 0     |        | 0       | 0        | -0.23 * | -0.45   |            | -0.14 * | -0.55 * |          | -0.19   | -0.34   |
| 17            | 0     |        |         |          | 0       |         | -0.12      | -0.15 * | -0.01   |          | -0.08   | 0       |
| 20            |       |        |         |          |         |         |            |         | 0       |          | -0.34   | -1.05 * |
| 24            |       | -0.06  |         | 0        |         | 0       |            | -0.02   | 0       |          | -0.35   |         |
| 31            | -0.01 | -0.11  | -0.02   |          | 0       |         | -0.07      | -0.11 * | -0.24 * |          | -0.27   |         |

**Fig. S1.** Time-series plot of depth-integrated whole water column (0.3–17 m) abundances of **(a)** *Synechococcus* (SYN) **(b)** picoeukaryotes I (Pico-I) **(c)** picoeukaryotes II (Pico-II) **(d)** picoeukaryotes III (Pico-III) **(e)** nanoeukaryotes I (Nano-I) **(f)** nanoeukaryotes II (Nano-II) **(g)** Total heterotrophic prokaryotes, **(h)** High nucleic acid heterotrophic prokaryotes (HNA), **(i)** Low nucleic acid heterotrophic prokaryotes (LNA), **(j)** Total virus, distinguished by flow cytometric analysis of each mesocosm community and in the surrounding waters (Baltic). Dotted lines indicate the end of Phase I and end of Phase II.

**Fig. S2.** Correlation plots of net growth rate against temporally averaged  $f\text{CO}_2$  for NMDS-based period 1 (days 3-13) for the different microbial groups distinguished by flow cytometry: **(a)** SYN, **(b)** Pico-I, **(c)** Pico-II, **(d)** Pico-III, **(e)** Nano-I, **(f)** Nano-II, **(g)** LNA prokaryotes, and **(h)** HNA Prokaryotes. A negative growth rate indicates a net loss of cells.

**Fig. S3.** Correlation plots of net growth rate against temporally averaged  $f\text{CO}_2$  for NMDS-based period 2 (days 16-24) for the different microbial groups distinguished by flow cytometry: **(a)** SYN, **(b)** Pico-I, **(c)** Pico-II, **(d)** Pico-III, **(e)** Nano-I, **(f)** Nano-II, **(g)** LNA prokaryotes, and **(h)** HNA Prokaryotes. A negative growth rate indicates a net loss of cells.

**Fig. S4.** Correlation plots of abundance versus actual  $f\text{CO}_2$  for different phytoplankton groups on specified days: **(a)** SYN on day 24, **(b)** Pico-I on day 5, **(c)** day 13 and **(d)** day 21, **(e)** Pico-II on day 17, **(f)** Pico-III on day 24, **(g)** Nano-I on day 17 and **(h)** Nano-II on day 17.

**Fig. S5.** Correlation plots of net growth rates versus temporally averaged  $f\text{CO}_2$  over specified periods: **(a)** Pico I on days 1-5, and **(b)** days 5-9, **(c)** Pico-II between days 12-17. A negative growth rate indicates a net loss of cells.

**Fig. S6.** Time-series plot of depth-integrated whole water column (0.3–10 m) abundances of **(a)** nanophytoplankton I and **(b)** nanophytoplankton II to show total abundances in Baltic Sea, surrounding water samples. Dotted lines indicate the end of Phase I and end of Phase II. Colours and symbols are the same as for Fig. S1.

**Fig. S7.** Time series plot of carbon biomass ( $\mu\text{mol L}^{-1}$ ) in top (0-10 m) for **(a)** Pico-III, **(b)** Nano-I and -II combined, **(c)** total phytoplankton enumerated by flow cytometry. Dotted lines indicate the end of Phase I and end of Phase II. Carbon biomass was calculated from mean cell abundances assuming the cells to be spherical and applying conversion factors of  $237 \text{ fg C } \mu\text{m}^{-3}$  (Worden et al. 2004) and  $196.5 \text{ fg C } \mu\text{m}^{-3}$  (Garrison et al. 2000) for pico- and nano-sized plankton based on the average cell diameters.

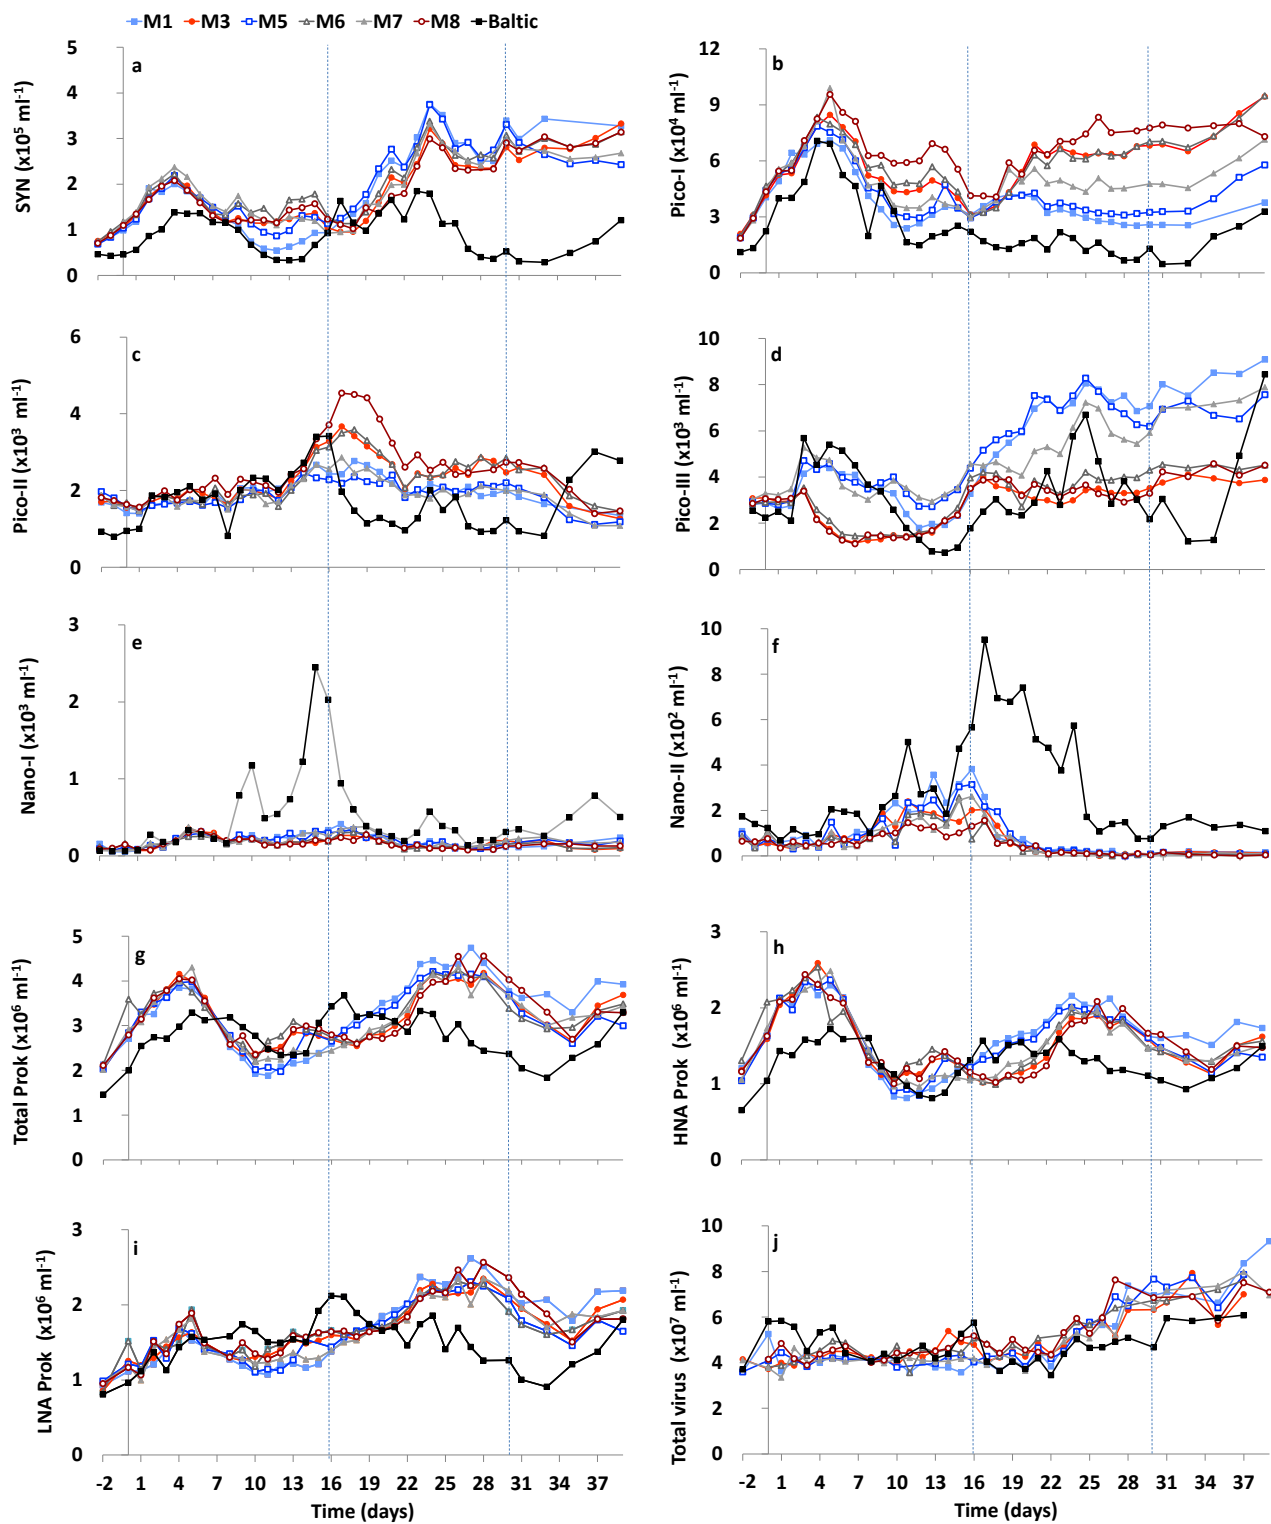

Figure S1.

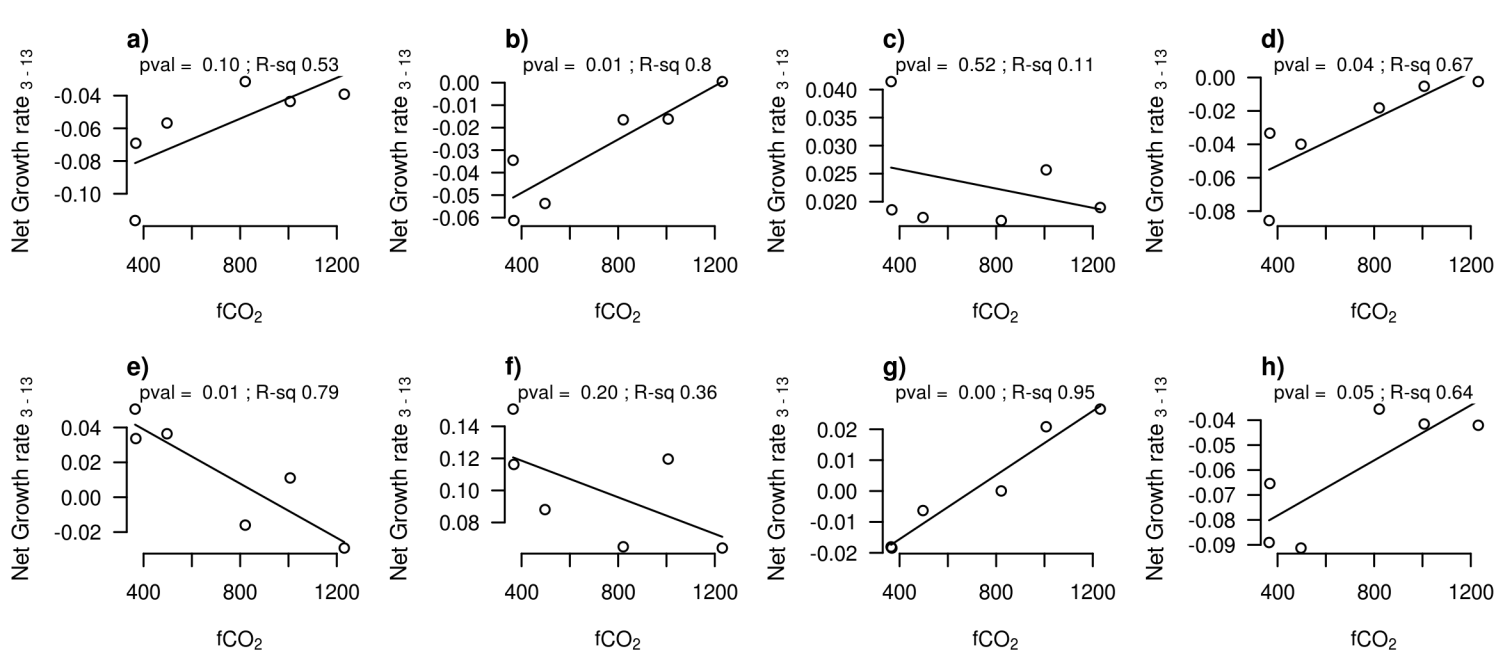

Figure S2.

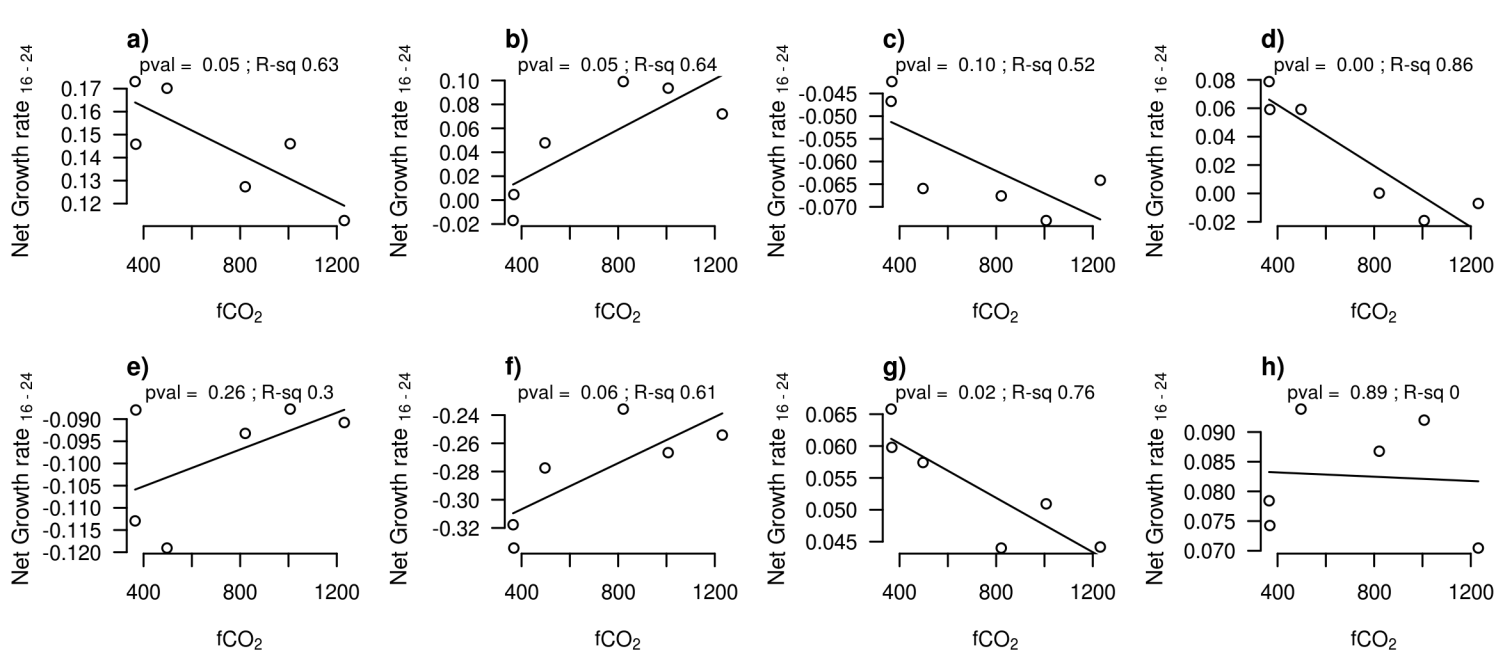

Figure S3.

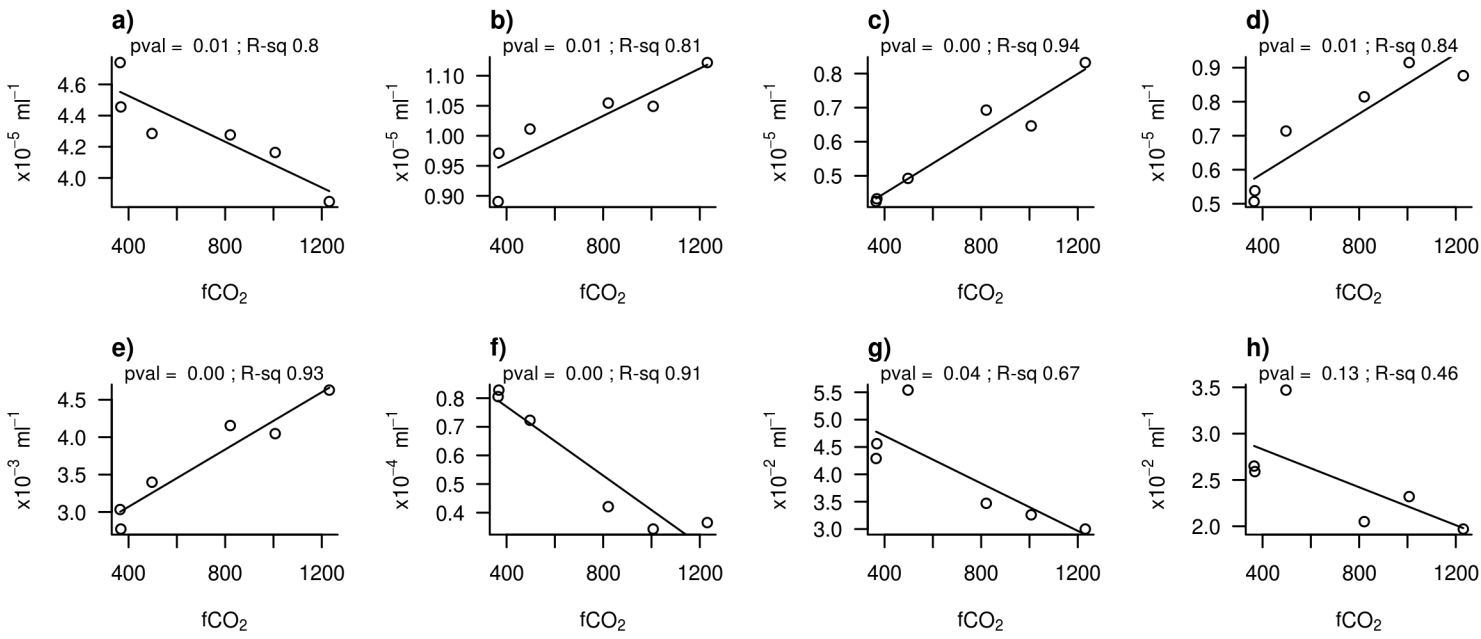

Figure S4.

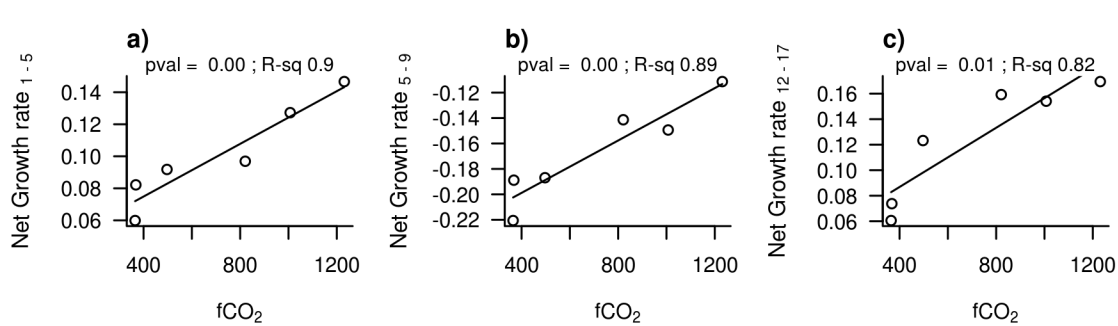

Figure S5.

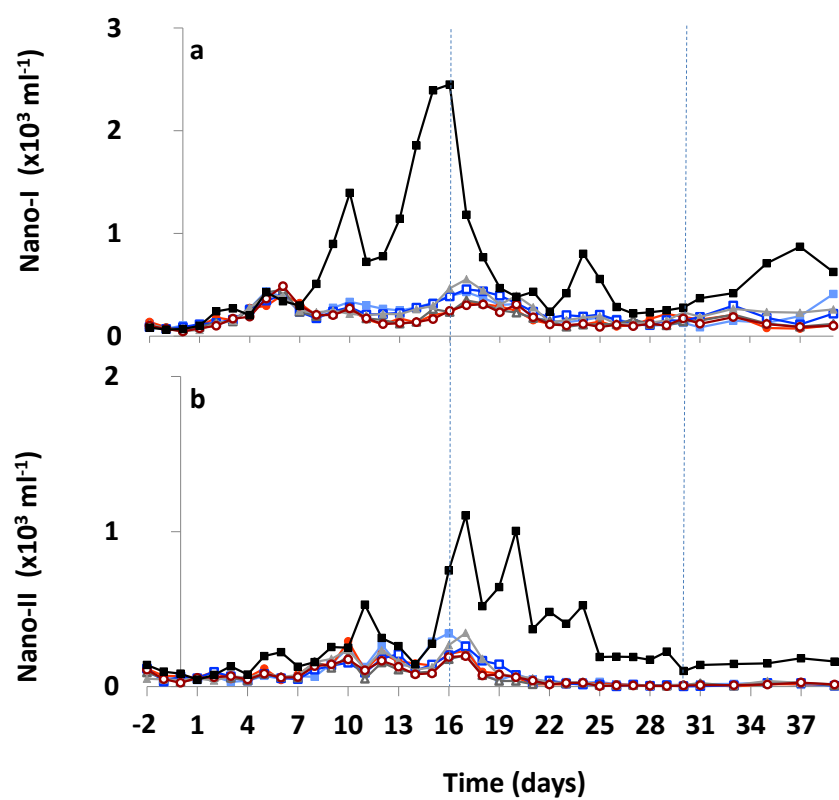

Figure S6.

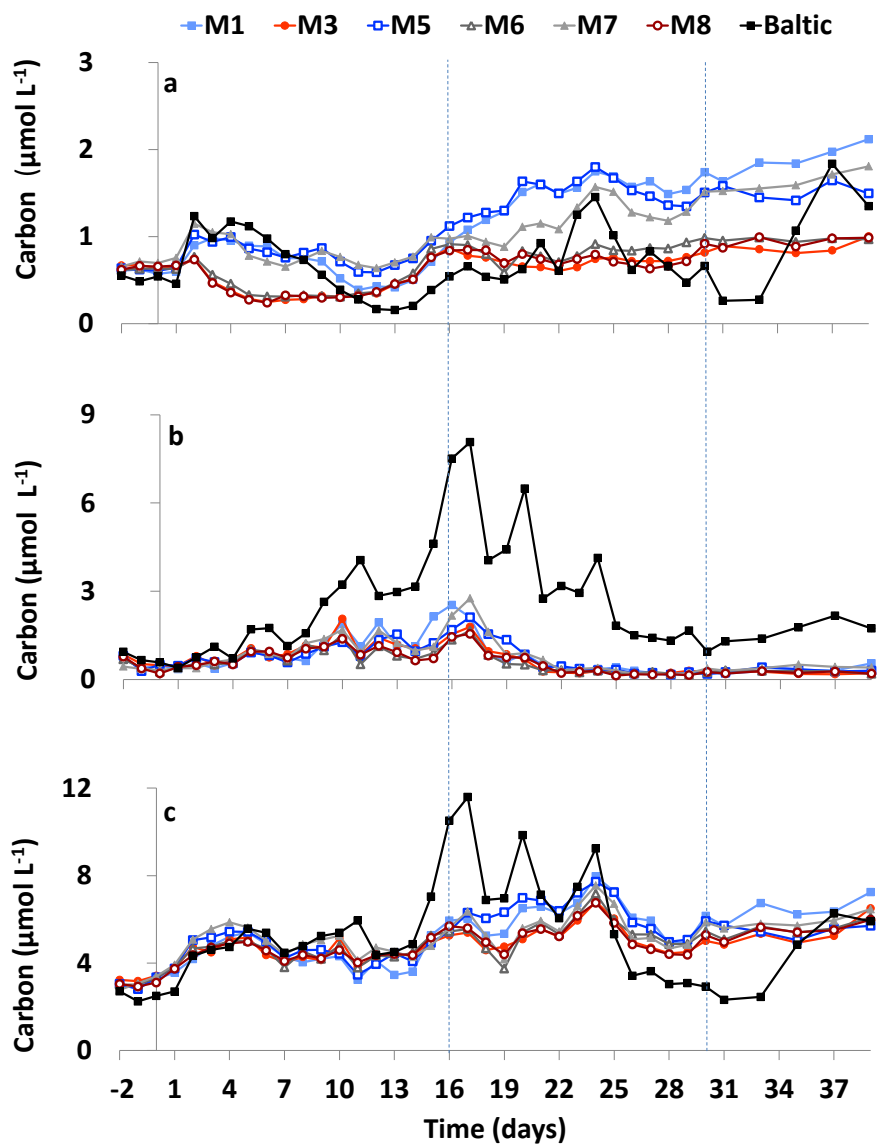

Figure S7.
